# Supplementary material for: Prevalence of Severe Maternal Morbidity and Factors Associated With Maternal Mortality in Ontario, Canada
Source: PubMed Central journal article supplement (PMC6324398; doi:10.1001/jamanetworkopen.2018.4571), 2018-11-09

## Supplementary Online Content

Ray JG, Park AL, Dzakpasu S, et al. Prevalence of severe maternal morbidity and factors associated with maternal mortality in Ontario, Canada. *JAMA Netw Open*. 2018;1(7):e184571. doi:10.1001/jamanetworkopen.2018.4571

**eTable.** Variables Used to Define Cohort Entry and Exclusion Criteria, Study Exposures, Outcomes and Adjustment Variables

**eFigure.** Flow Chart of Cohort Inclusions and Exclusions

This supplementary material has been provided by the authors to give readers additional information about their work.

**eTable.** Variables Used to Define Cohort Entry and Exclusion Criteria, Study Exposures, Outcomes and Adjustment Variables

| Assessment                    | Timing                                                  | Disease or procedure or condition                                                                                                 | ICD-9 [ICD-10-CA] codes in CIHI--DAD or NACRS <sup>a</sup>                                                                                                                                                                                                                                                                             | OHIP ICD-9 diagnostic codes or fee codes {or other source if in parentheses} <sup>a</sup>                                                                                                                                                    | PubMed link to related validation studies for some codes                                                                                                                                          |
|-------------------------------|---------------------------------------------------------|-----------------------------------------------------------------------------------------------------------------------------------|----------------------------------------------------------------------------------------------------------------------------------------------------------------------------------------------------------------------------------------------------------------------------------------------------------------------------------------|----------------------------------------------------------------------------------------------------------------------------------------------------------------------------------------------------------------------------------------------|---------------------------------------------------------------------------------------------------------------------------------------------------------------------------------------------------|
| <b>Cohort entry criterion</b> | Index birth delivery hospitalization                    | Live birth or stillbirth obstetrical deliveries at ≥ 20 weeks' gestation, between April 1, 2002 and February 18, 2017             | Main patient service code for “obstetrical delivery” in DAD (and linked to their newborn records in the ICES MOMBABY dataset:<br><a href="https://datadictionary.ices.on.ca/Applications/DataDictionary/Library.aspx?Library=MOMBABY">https://datadictionary.ices.on.ca/Applications/DataDictionary/Library.aspx?Library=MOMBABY</a> ) | --                                                                                                                                                                                                                                           | --                                                                                                                                                                                                |
| <b>Exclusion criteria</b>     | At the time of the index birth delivery hospitalization | Non-Ontario resident or invalid OHIP number                                                                                       | --                                                                                                                                                                                                                                                                                                                                     | {Registered Persons Database (RPDB). See:<br><a href="https://datadictionary.ices.on.ca/Applications/DataDictionary/Library.aspx?Library=RPDB">https://datadictionary.ices.on.ca/Applications/DataDictionary/Library.aspx?Library=RPDB</a> } | --                                                                                                                                                                                                |
|                               | Same                                                    | Maternal age < 10 or > 55 years, or missing                                                                                       | --                                                                                                                                                                                                                                                                                                                                     | {RPDB}                                                                                                                                                                                                                                       | --                                                                                                                                                                                                |
| <b>Main study exposure</b>    | April 1, 2002 and March 31, 2017                        | Number of severe maternal morbidities between 20 <sup>07</sup> weeks' gestation and before 43 days after the index birth delivery | 1. Severe preeclampsia and HELLP syndrome<br>2. Eclampsia<br>3. Cerebral venous thrombosis in pregnancy, or in the puerperium<br>4. Acute fatty liver with red blood cell (RBC) or plasma transfusion<br>5. Pulmonary, cardiac, and CNS complications of anaesthesia during                                                            | --                                                                                                                                                                                                                                           | Previous definition by the Canadian Perinatal Surveillance System ( <a href="https://www.ncbi.nlm.nih.gov/pmc/articles/PMC1216316">https://www.ncbi.nlm.nih.gov/pmc/articles/PMC1216316</a> ) and |

| Assessment | Timing | Disease or procedure or condition | ICD-9 [ICD-10-CA] codes in CIHI--DAD or NACRS <sup>a</sup>                                                                                                                                                                                                                                                                                                                                                                                                                                                                                                                                                                                                                                                                                                                                                                                                                                                                                                                                                                                                                                                    | OHIP ICD-9 diagnostic codes or fee codes {or other source if in parentheses} <sup>a</sup> | PubMed link to related validation studies for some codes                                                  |
|------------|--------|-----------------------------------|---------------------------------------------------------------------------------------------------------------------------------------------------------------------------------------------------------------------------------------------------------------------------------------------------------------------------------------------------------------------------------------------------------------------------------------------------------------------------------------------------------------------------------------------------------------------------------------------------------------------------------------------------------------------------------------------------------------------------------------------------------------------------------------------------------------------------------------------------------------------------------------------------------------------------------------------------------------------------------------------------------------------------------------------------------------------------------------------------------------|-------------------------------------------------------------------------------------------|-----------------------------------------------------------------------------------------------------------|
|            |        |                                   | pregnancy, the puerperium, or labour and delivery<br>6. Placenta previa with hemorrhage with RBC transfusion<br>7. Placental abruption with coagulation defect<br>8. Antepartum hemorrhage with coagulation defect<br>9. Intrapartum hemorrhage with coagulation defect<br>10. Intrapartum hemorrhage with RBC transfusion<br>11. Rupture of the uterus with RBC transfusion, procedures to the uterus or hysterectomy<br>12. Postpartum hemorrhage with RBC transfusion, procedures to the uterus or hysterectomy<br>13. Cardiac conditions<br>14. Obstetric shock<br>15. Septicemia during labour<br>16. Complications of obstetric surgery and procedures<br>17. Puerperal sepsis<br>18. Obstetric embolism<br>19. Acute renal failure<br>20. Disseminated intravascular coagulation<br>21. Sickle cell anemia with crisis<br>22. Acute psychosis<br>23. Status epilepticus<br>24. Cerebral edema or coma<br>25. Cerebrovascular diseases: subarachnoid and intracranial hemorrhage, cerebral infarction, stroke<br>26. Status asthmaticus<br>27. Adult respiratory distress syndrome<br>28. Acute abdomen |                                                                                           | <a href="https://www.ncbi.nlm.nih.gov/pubmed/21050516">https://www.ncbi.nlm.nih.gov/pubmed/21050516</a> ) |

| Assessment        | Timing                                                                  | Disease or procedure or condition   | ICD-9 [ICD-10-CA] codes in CIHI--DAD or NACRS <sup>a</sup>                                                                                                                                                                                                                                                                                                                                                                                                                                                                               | OHIP ICD-9 diagnostic codes or fee codes {or other source if in parentheses} <sup>a</sup>                                                                                                                                                                        | PubMed link to related validation studies for some codes |
|-------------------|-------------------------------------------------------------------------|-------------------------------------|------------------------------------------------------------------------------------------------------------------------------------------------------------------------------------------------------------------------------------------------------------------------------------------------------------------------------------------------------------------------------------------------------------------------------------------------------------------------------------------------------------------------------------------|------------------------------------------------------------------------------------------------------------------------------------------------------------------------------------------------------------------------------------------------------------------|----------------------------------------------------------|
|                   |                                                                         |                                     | 29. Hepatic failure<br>30. Assisted ventilation through endotracheal tube<br>31. Assisted ventilation through tracheostomy<br>32. Hysterectomy<br>33. Dialysis<br>34. Evacuation of incisional hematoma with RBC transfusion<br>35. Repair of bladder, urethra, or intestine<br>36. Procedures to the uterus/pelvic vessels with RBC transfusion<br>37. Surgical or manual correction of inverted uterus for vaginal births only<br>38. Reclosure of caesarean wound<br>39. Curettage with RBC transfusion<br>40. Maternal ICU admission |                                                                                                                                                                                                                                                                  |                                                          |
| <b>Outcome</b>    | Date of death between 0 and 42 days after the index birth delivery date | All-cause maternal mortality        | --                                                                                                                                                                                                                                                                                                                                                                                                                                                                                                                                       | {RPDB} and {Office of the Registrar General Deaths (ORG-D). See: <a href="https://datadictionary.ices.on.ca/Applications/DataDictionary/Library.aspx?Library=ORGD">https://datadictionary.ices.on.ca/Applications/DataDictionary/Library.aspx?Library=ORGD</a> } | --                                                       |
| <b>Covariates</b> | At the time of the index birth delivery hospitalization                 | Maternal age (years)                | --                                                                                                                                                                                                                                                                                                                                                                                                                                                                                                                                       | {RPDB}                                                                                                                                                                                                                                                           | --                                                       |
|                   | At the index birth delivery hospitalization                             | Maternal area-level income quintile | --                                                                                                                                                                                                                                                                                                                                                                                                                                                                                                                                       | {Statistics Canada census data}                                                                                                                                                                                                                                  | --                                                       |
|                   | Same                                                                    | Maternal rural residence            | --                                                                                                                                                                                                                                                                                                                                                                                                                                                                                                                                       | {Statistics Canada census data}                                                                                                                                                                                                                                  | --                                                       |

| Assessment | Timing                                                                 | Disease or procedure or condition                                                                                       | ICD-9 [ICD-10-CA] codes in CIHI-DAD or NACRS <sup>a</sup> | OHIP ICD-9 diagnostic codes or fee codes {or other source if in parentheses} <sup>a</sup>                                                                                                                                                                                                 | PubMed link to related validation studies for some codes                                                |
|------------|------------------------------------------------------------------------|-------------------------------------------------------------------------------------------------------------------------|-----------------------------------------------------------|-------------------------------------------------------------------------------------------------------------------------------------------------------------------------------------------------------------------------------------------------------------------------------------------|---------------------------------------------------------------------------------------------------------|
|            | Same                                                                   | World region of origin:<br>1) Caribbean or Sub-Saharan Africa<br>2) South Asia<br>3) East Asia<br>4) Canada<br>5) Other | --                                                        | {Immigration, Refugees and Citizenship Canada (IRCC)'s Permanent Resident Database. See:<br><a href="https://datadictionary.ices.on.ca/Applications/DataDictionary/Library.aspx?Library=CIC">https://datadictionary.ices.on.ca/Applications/DataDictionary/Library.aspx?Library=CIC</a> } | --                                                                                                      |
|            | Same                                                                   | Parity                                                                                                                  | CIHI-DAD (PREVBIRTH)                                      | --                                                                                                                                                                                                                                                                                        | --                                                                                                      |
|            | Same                                                                   | Multiple gestation                                                                                                      | Z37.2-Z37.7, Z37.90, O30.0-O30.2, O30.8-O30.9, O31        | --                                                                                                                                                                                                                                                                                        | --                                                                                                      |
|            | Same                                                                   | Stillbirth                                                                                                              | Z37.1, Z37.3, Z37.4, Z37.6, Z37.7, O36.4                  | --                                                                                                                                                                                                                                                                                        | --                                                                                                      |
|            | From 20 gestational weeks up to 42 days after the index birth delivery | Any preeclampsia                                                                                                        | O11, O14                                                  | --                                                                                                                                                                                                                                                                                        | --                                                                                                      |
|            | Same                                                                   | Gestational hypertension                                                                                                | O13                                                       | --                                                                                                                                                                                                                                                                                        | --                                                                                                      |
|            | Up to 1 year before the index birth delivery hospitalization           | Diabetes mellitus                                                                                                       | 250, 648.8 [E10, E11, E13, E14, O244]                     | 250                                                                                                                                                                                                                                                                                       | <a href="https://www.ncbi.nlm.nih.gov/pubmed/11874939">https://www.ncbi.nlm.nih.gov/pubmed/11874939</a> |
|            | Same                                                                   | Chronic hypertension                                                                                                    | 401, 405, 642.0-642.2, 642.7 [I10, I15, O10, O11]         | 401                                                                                                                                                                                                                                                                                       | <a href="https://www.ncbi.nlm.nih.gov/pubmed/19858407">https://www.ncbi.nlm.nih.gov/pubmed/19858407</a> |

| Assessment | Timing | Disease or procedure or condition | ICD-9 [ICD-10-CA] codes in CIHI--DAD or NACRS <sup>a</sup>                                                                                                                                                                                                                                                                                                                                                                                                          | OHIP ICD-9 diagnostic codes or fee codes {or other source if in parentheses} <sup>a</sup> | PubMed link to related validation studies for some codes                                                |
|------------|--------|-----------------------------------|---------------------------------------------------------------------------------------------------------------------------------------------------------------------------------------------------------------------------------------------------------------------------------------------------------------------------------------------------------------------------------------------------------------------------------------------------------------------|-------------------------------------------------------------------------------------------|---------------------------------------------------------------------------------------------------------|
|            | Same   | Renal disease                     | 584.5-584.9, 669.3, 958.5 634.3, 635.3, 636.3, 637.3, 638.3, 639.3, 250.4, 274.1, 403, 404, 405.01, 405.11, 405.91, 440.1, 446.21, 581, 582, 583, 585, 586, 587, 588.0, 588.8, 588.9, 590.0, 593.7, 791.0, 794.4 [N17, O08.4, T79.5, O90.4, E10.20, E10.21, E10.23, E11.20, E11.21, E11.23, M10.39, I12, I13, I15.0, I70.1, M31.0, N01, N03, N04, N05, N06, N07, N08, N11, N12, N13.7, N13.8, N13.9, N14, N15, N16, N18, N19, N25.0, N25.8, N25.9, N26, R80, R94.4] | 403, 581, 585                                                                             | <a href="https://www.ncbi.nlm.nih.gov/pubmed/23560464">https://www.ncbi.nlm.nih.gov/pubmed/23560464</a> |
|            | Same   | Illicit drug or tobacco use       | 291, 292, 2940, 303, 304, 305, 648.3, 649.0, 6555, 980 [F10-F19, F55, G312, O354, O355, T51, T652, Z720, Z721, Z722]                                                                                                                                                                                                                                                                                                                                                | 291, 292, 303, 304, 305                                                                   |                                                                                                         |

<sup>a</sup> CIHI Canadian Institute for Health Information; DAD Discharge Abstract Database; ICD-9 International Classification of Diseases, 9th Revision (before 2002/03); ICD-10-CA International Classification of Diseases, 10th Revision, Canada (2002/03 onward); ICU Intensive Care Unit; IRCC Immigration, Refugees and Citizenship Canada; NACRS National Ambulatory Care Reporting System; OHIP Ontario Health Insurance Plan; ORG-D Office of the Registrar General Deaths; RBC Red Blood Cell; RPDB Registered Persons Database

**eFigure.** Flow Chart of Cohort Inclusions and Exclusions

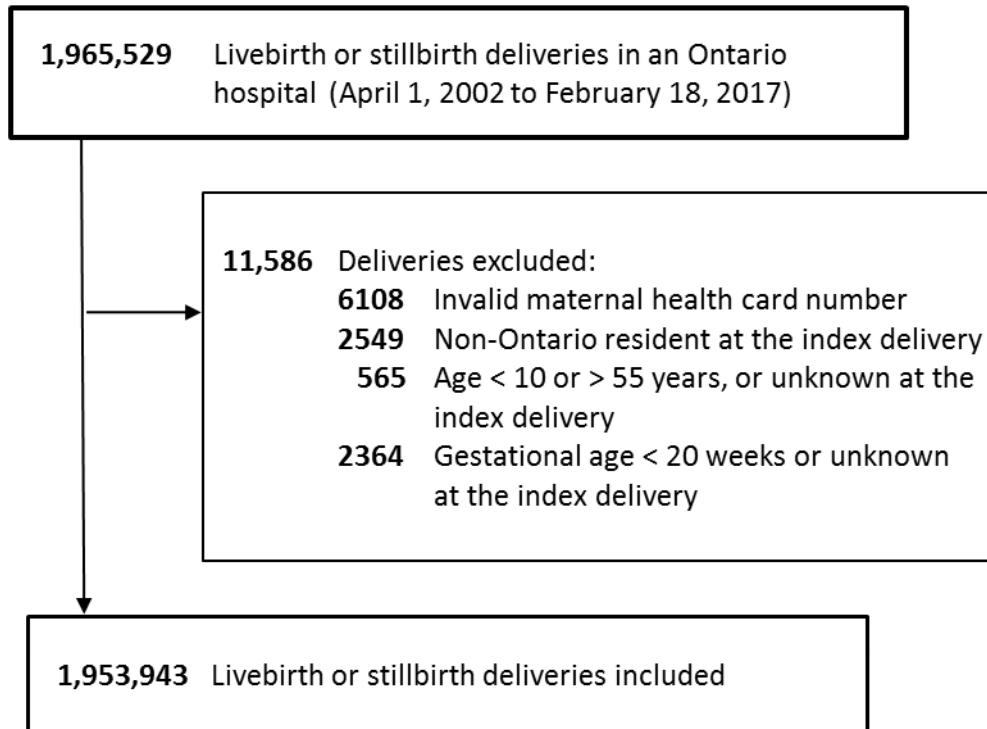

Supplement: jamanetwopen-1-e184571-s001.pdf [file jamanetwopen-1-e184571-s001.pdf]
